# Supplementary material
Source: publisher figshare collection journal article supplement (https://karger.figshare.com/articles/dataset/_/15060006)
Supplement: Supplementary file 1 [file 1]

Archive with 5 entries (5 files):
- Supplementary material-Supplementary_Fig_1.pdf
- Supplementary material-Supplementary_Fig_2.pdf
- Supplementary material-Supplementary_Fig_3.pdf
- Supplementary material-Supplementary_Fig_4.pdf
- Supplementary material-Supplementary_Table_1.docx
