# Supplementary material
Source: publisher figshare collection journal article supplement (https://karger.figshare.com/articles/dataset/_/15060006)

Supplementary Figure 1: Forest plots for A) overall survival (OS), B) progression free survival/relapse free survival (PFS/RFS), and C) grade 3/4 AEs between combination and gemcitabine monotherapy in resected pancreatic cancer patients

OS - combination regimen vs. gem  
Resectable Pancreatic Cancer

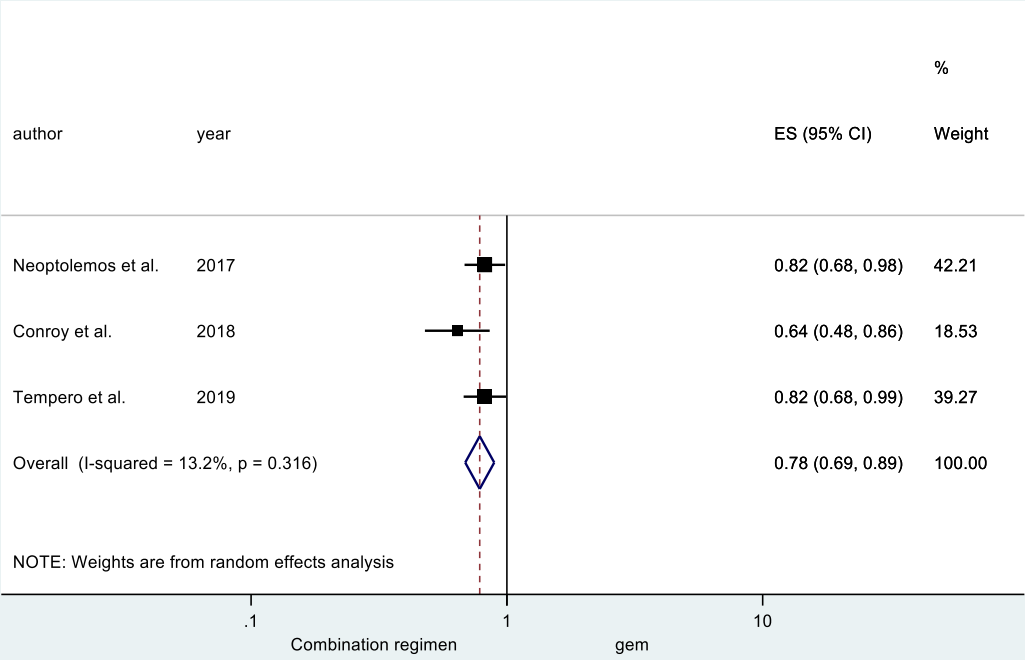

PFS/RFS - combination regimen vs. gem  
Resectable Pancreatic Cancer

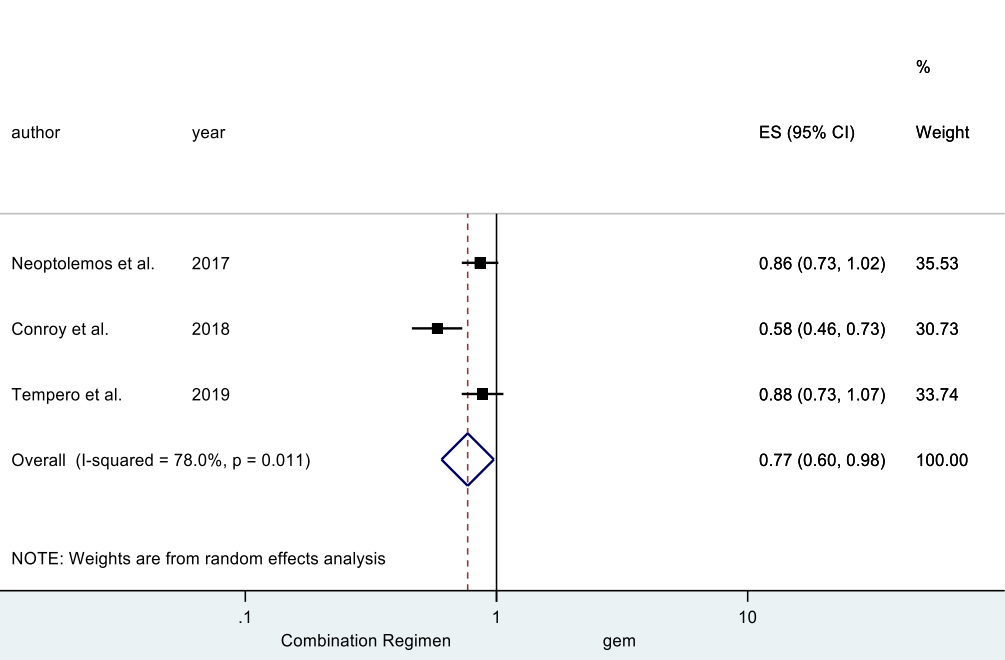

AE - combination regimen vs. gem  
Resectable Pancreatic Cancer

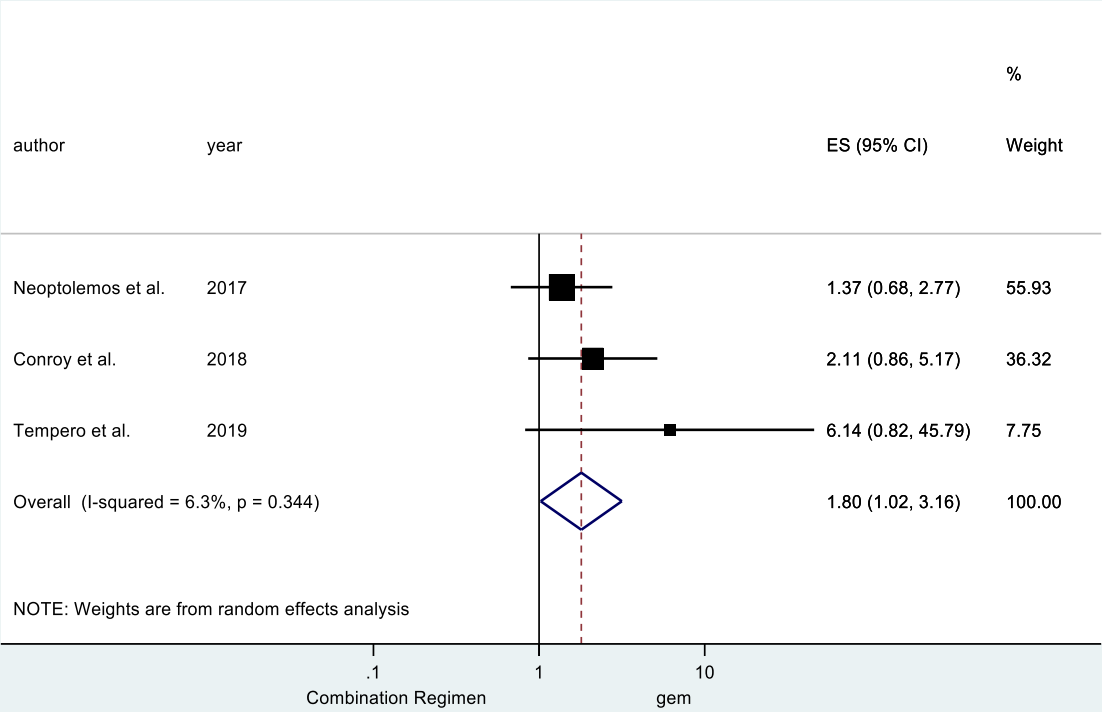

Supplement: Supplementary file 1 [file 1 › Supplementary material-Supplementary_Fig_1.pdf]
