# Supplementary material
Source: publisher figshare collection journal article supplement (https://karger.figshare.com/articles/dataset/_/15060006)

Supplementary Figure 2: Forest plots for A) overall survival (OS), B) progression free survival/relapse free survival (PFS/RFS), and C) grade 3/4 AEs between combination and gemcitabine monotherapy in advanced pancreatic cancer patients

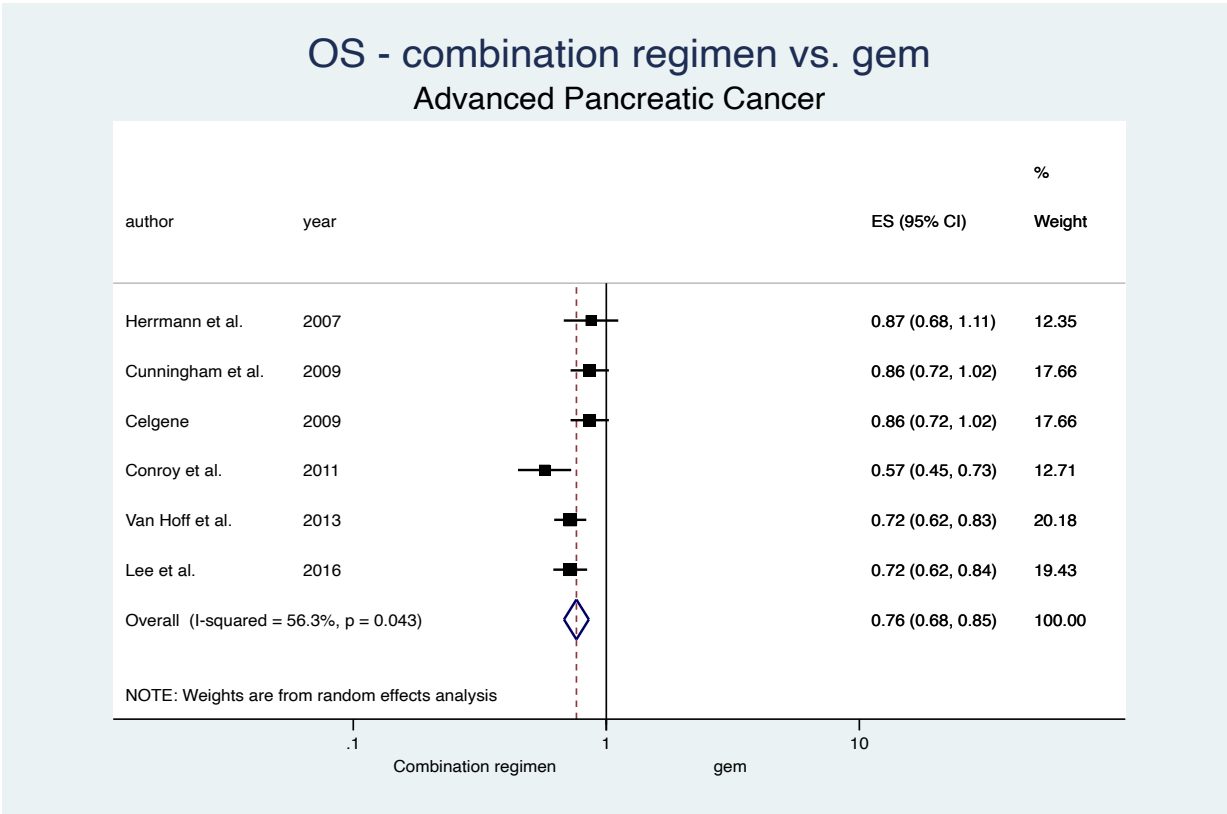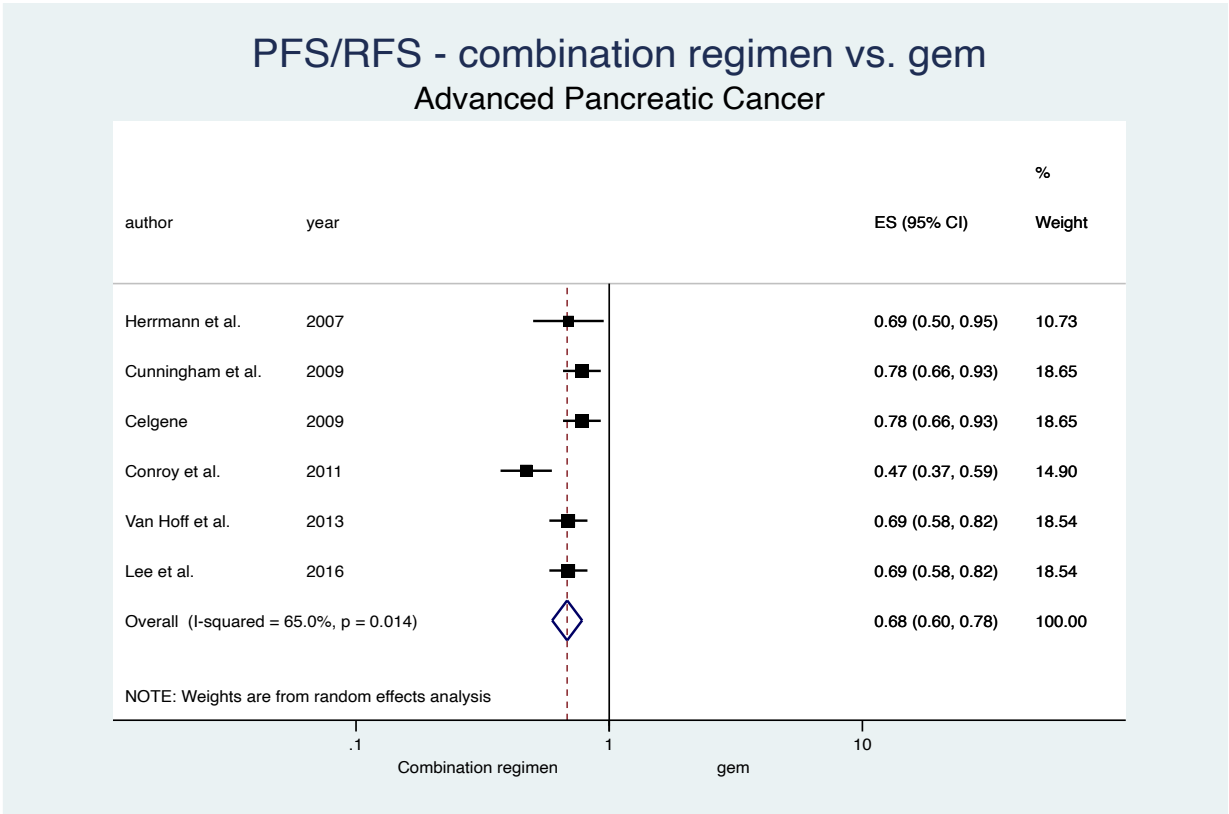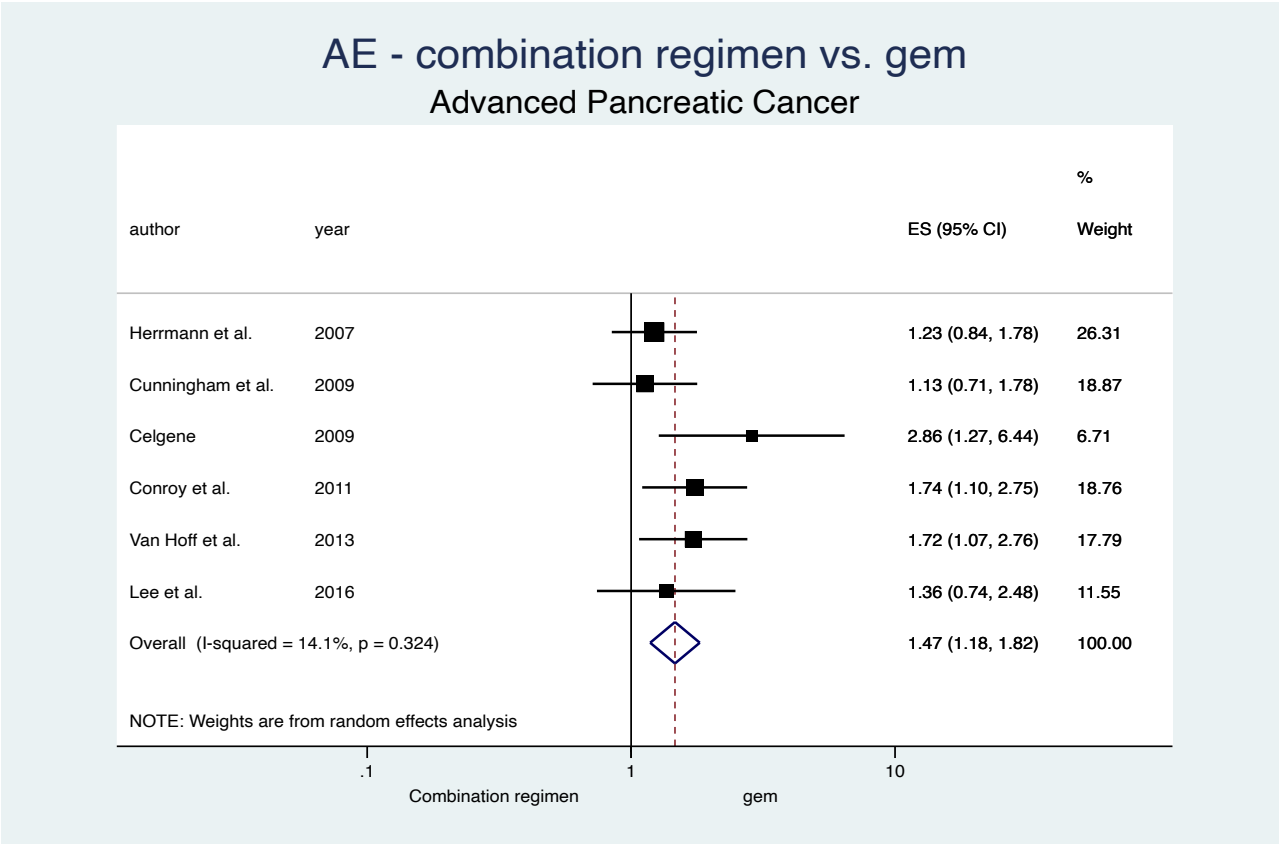

Supplement: Supplementary file 1 [file 1 › Supplementary material-Supplementary_Fig_2.pdf]
