# Supplementary material
Source: publisher figshare collection journal article supplement (https://karger.figshare.com/articles/dataset/_/15060006)

Supplementary Figure 3: Funnel plots for Egger’s test for resectable pancreatic cancer combination regimen vs. gemcitabine monotherapy

OS - combination regimen vs. gem  
Resectable Pancreatic Cancer

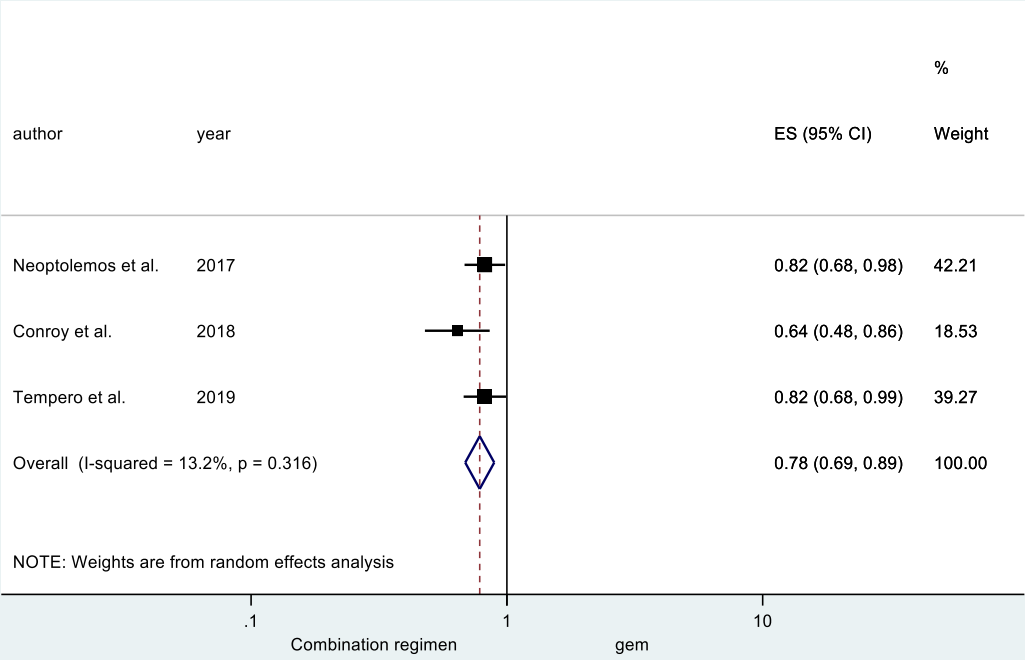

PFS/RFS - combination regimen vs. gem  
Resectable Pancreatic Cancer

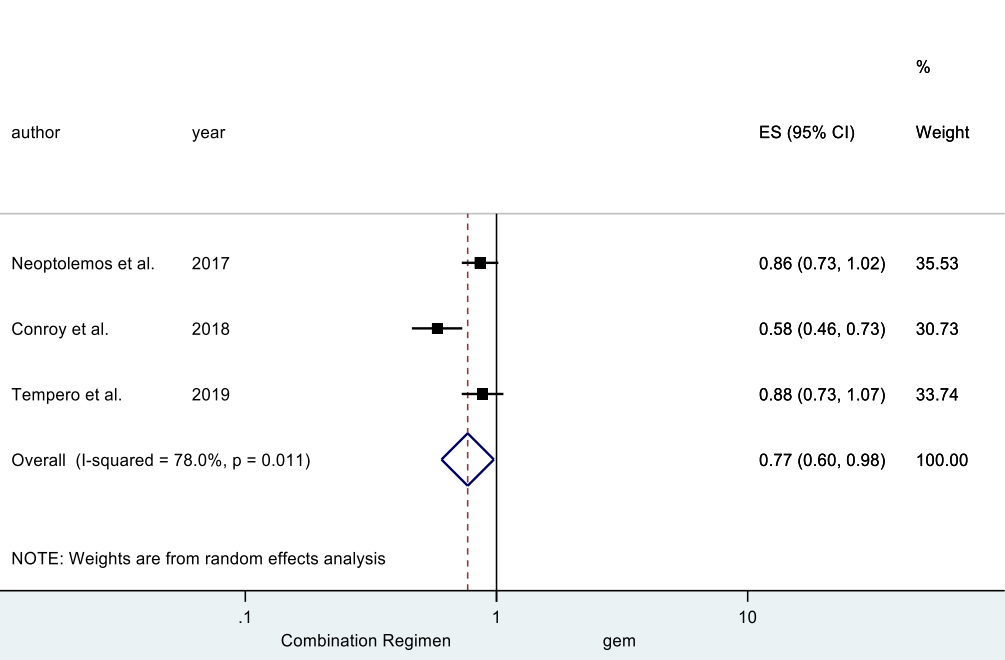

AE - combination regimen vs. gem  
Resectable Pancreatic Cancer

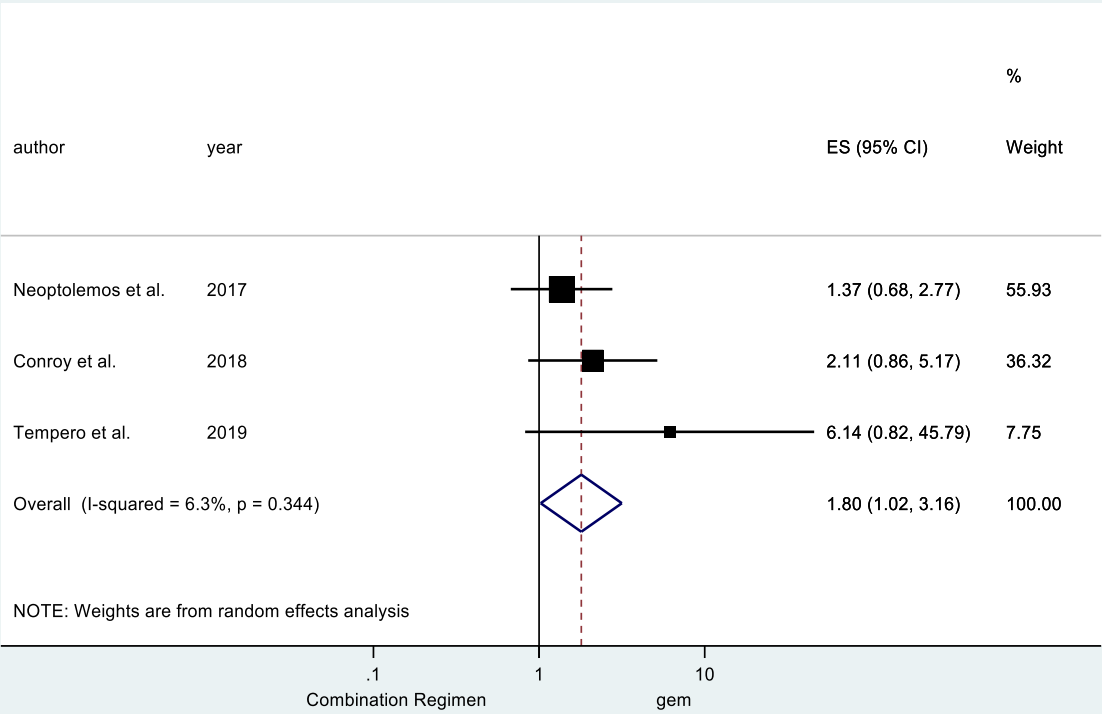

Supplement: Supplementary file 1 [file 1 › Supplementary material-Supplementary_Fig_3.pdf]
