# Supplementary material
Source: publisher figshare collection journal article supplement (https://karger.figshare.com/articles/dataset/_/15060006)

Supplementary Figure 4: Funnel plots for Egger's test for advanced pancreatic cancer combination regimen vs. gemcitabine monotherapy

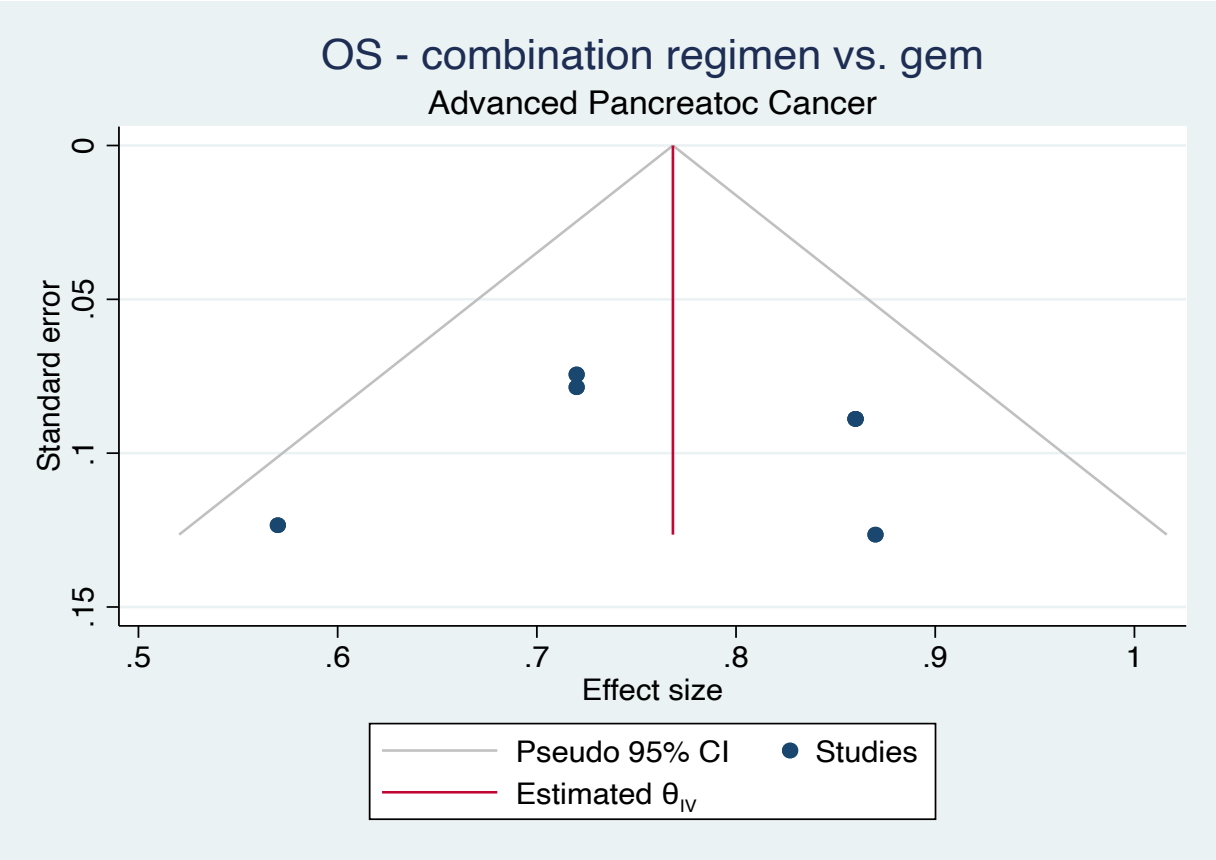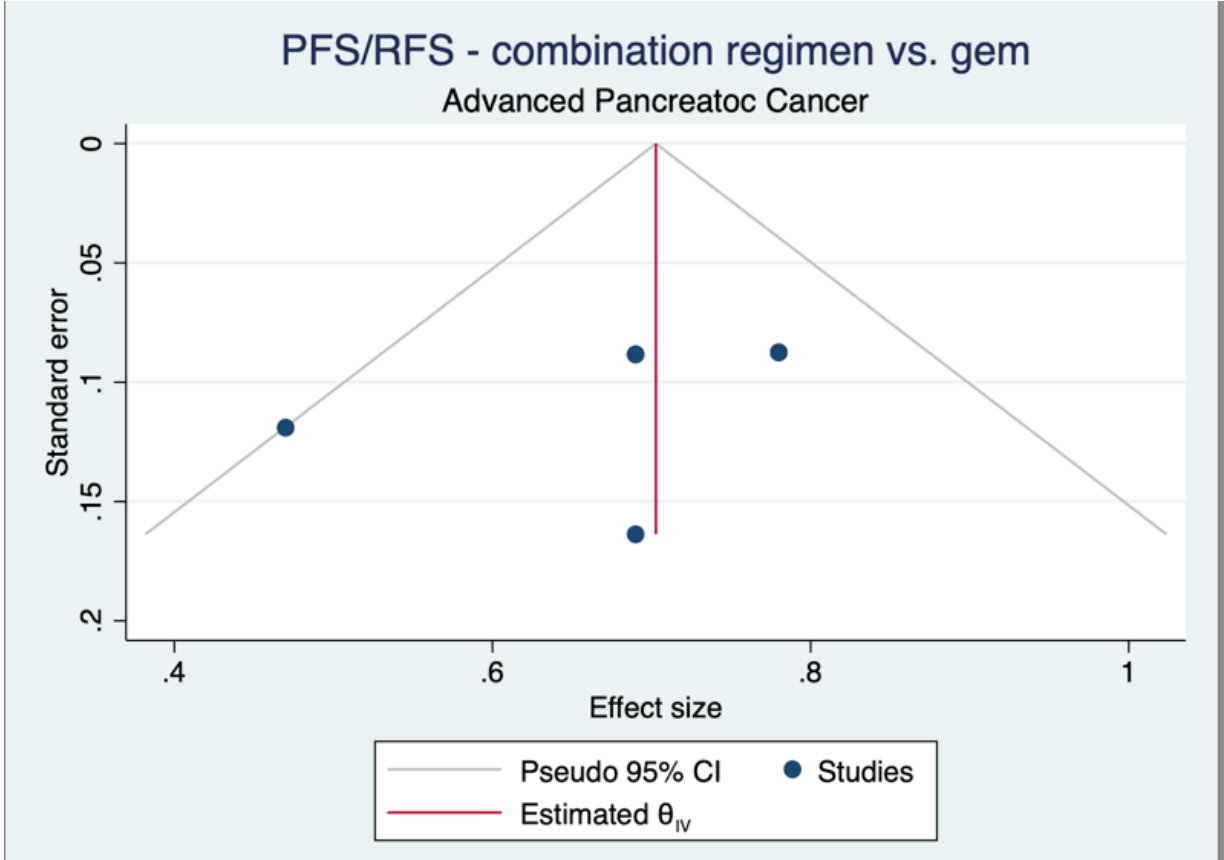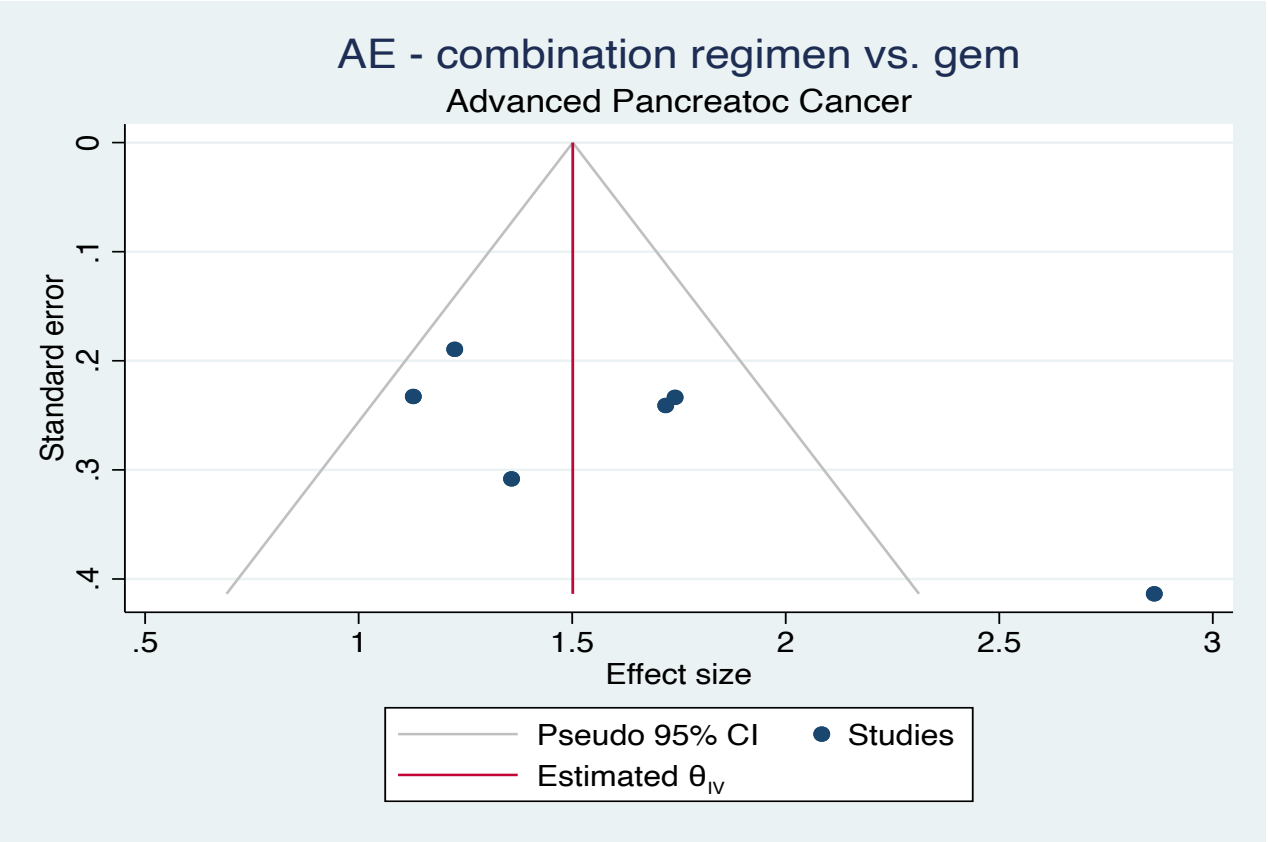

Supplement: Supplementary file 1 [file 1 › Supplementary material-Supplementary_Fig_4.pdf]
