# Supplementary material
Source: publisher figshare collection journal article supplement (https://karger.figshare.com/articles/dataset/_/15060006)
Supplement: Supplementary file 1 [file 1 › Supplementary material-Supplementary_Table_1.docx]

Supplementary Table 1: *Search strategy and study counts from electronic databases*

Our final search strategy utilized the key words: “pancreatic cancer or adenocarcinoma or advanced pancreatic cancer or advanced pancreatic adenocarcinoma or metastatic pancreatic cancer or metastatic pancreatic adenocarcinoma or resectable pancreatic cancer or resected pancreatic adenocarcinoma or resect pancreatic cancer” and “gemcitabine or capecitabine or nab paclitaxel or FOLFIRINOX” and “trial or clinical trial or randomized clinical trial or randomized controlled trial”

| Database searched | Study count |
| --- | --- |
| PubMed | 307 |
| Embase | 351 |
| Cochrane | 1314 |
| Clinicaltrials.gov | 12 |
| Total | 1984 |
